# Supplementary material for: A novel acidification mechanism for greatly enhanced oxygen supply to the fish retina
Source: eLife journal article supplement (doi:10.7554/elife.58995), 2020-08-24

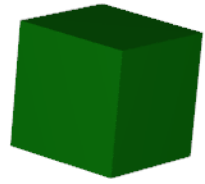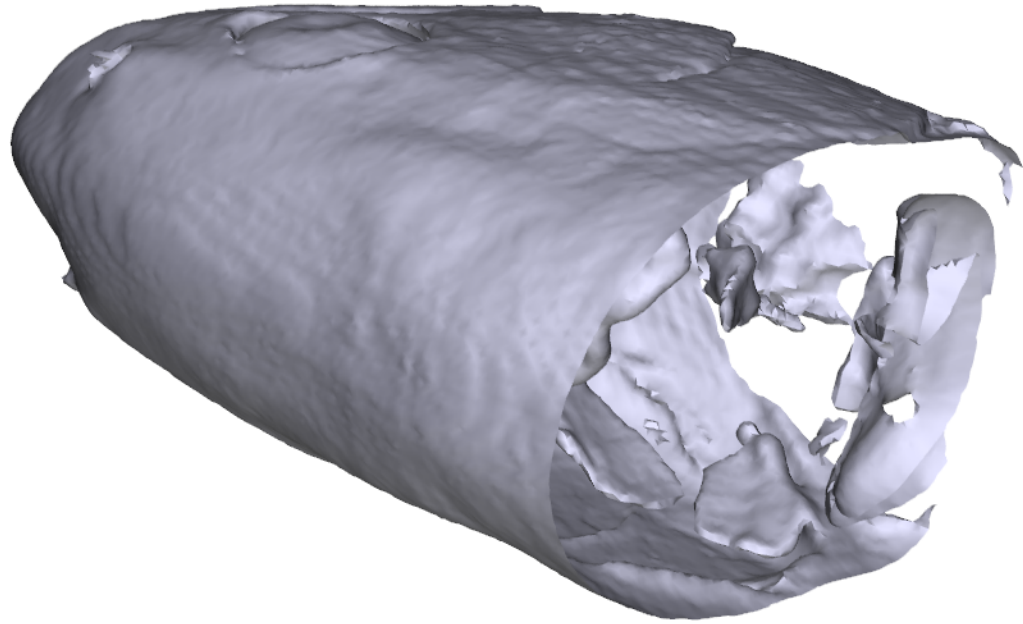

Supplement: supp1 [file elife-58995-supp1-v2.pdf]
